# Supplementary material for: ATAQS: A computational software tool for high throughput transition optimization and validation for selected reaction monitoring mass spectrometry
Source: Springer Nature journal article supplement (doi:10.1186/1471-2105-12-78), 2011-03-18

(a)

The screenshot shows the ATAGS software interface. The main window displays the 'Generate Protein List' step. The project name is 'KINase\_32'. The date is '2018-04-02 12:42:29 AM EDT'. The author is 'M. Yandemoulin'. The project setup includes 'Generate Protein List', 'Validate Protein List', 'Generate Transition List', 'Validate Transition List', and 'Publish Validated Transition List'. The current step is 'Generate Protein List'. The 'Existing Protein List' is 'Selected a protein list'. The 'Optimized Final Protein List File' is empty. The '32 Proteins' section shows a list of proteins with checkboxes for selection. A red arrow points from the bottom of this window towards the network visualization in part (b).

| Selected                            | Protein   |
|-------------------------------------|-----------|
| <input checked="" type="checkbox"/> | P10000395 |
| <input checked="" type="checkbox"/> | P10000379 |
| <input checked="" type="checkbox"/> | P10000703 |
| <input checked="" type="checkbox"/> | P10000104 |
| <input checked="" type="checkbox"/> | P10002385 |
| <input checked="" type="checkbox"/> | P10001292 |
| <input checked="" type="checkbox"/> | P10004488 |
| <input checked="" type="checkbox"/> | P10004916 |
| <input checked="" type="checkbox"/> | P10002952 |
| <input checked="" type="checkbox"/> | P10001248 |
| <input checked="" type="checkbox"/> | P10001387 |
| <input checked="" type="checkbox"/> | P10002542 |
| <input checked="" type="checkbox"/> | P10001928 |
| <input checked="" type="checkbox"/> | P10002608 |
| <input checked="" type="checkbox"/> | P10002689 |
| <input checked="" type="checkbox"/> | P10007251 |
| <input checked="" type="checkbox"/> | P10002873 |
| <input checked="" type="checkbox"/> | P10002083 |
| <input checked="" type="checkbox"/> | P10001481 |
| <input checked="" type="checkbox"/> | P10002284 |

(b)

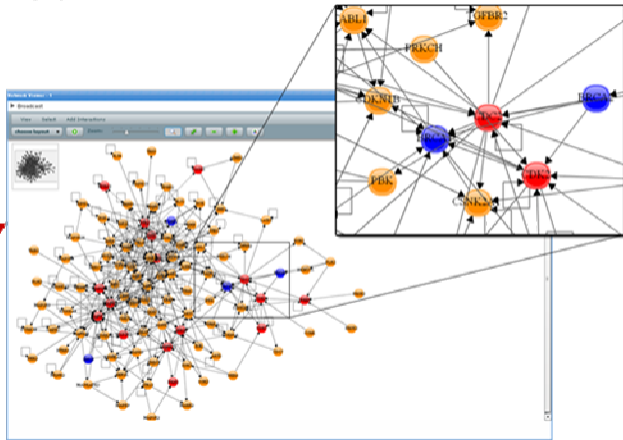

Supplement: 12859_2010_4455_MOESM4_ESM.pdf [file 12859_2010_4455_MOESM4_ESM.pdf]
