# Supplementary material for: ATAQS: A computational software tool for high throughput transition optimization and validation for selected reaction monitoring mass spectrometry
Source: Springer Nature journal article supplement (doi:10.1186/1471-2105-12-78), 2011-03-18
Supplement: 12859_2010_4455_MOESM5_ESM.pdf [file 12859_2010_4455_MOESM5_ESM.pdf]

Projects

- Kinase\_32
  - [Generate Protein List](#)
  - [Validate Protein List](#)
  - [Generate Transition List](#)
  - [Validate Transition List](#)
  - [Publish Validated Transition List](#)
- Diabetes
  - [Generate Protein List](#)
  - [Validate Protein List](#)
  - [Generate Transition List](#)
  - [Validate Transition List](#)
  - [Publish Validated Transition List](#)

**Edit**

Project: **Kinase\_32**  
 Date: 2010.04.02 12:42:29.000000000  
 Author: **Mi-YounBrosniak**

Project Setup ■ [Generate Protein List](#) ■ [Validate Protein List](#) ■ [Generate Transition List](#) ■ [Validate Transition List](#) ■ [Publish Validated Transition List](#)

**Step 3: Generate Transition List**

Load Transitions

Get Transitions From:

Upload Transitions From:

Maximum Transition Calculator

Proteins  x Peptides  x Transitions  = Maximum SRM Transitions

Target

Choose: [Add Labeled Pairs](#)

Modification:

- Mystery\_NTERM
- ICPL\_light\_K
- ICPL-N\_heavy\_NTERM
- ICPL\_heavy\_K
- ICAT\_heavy\_C
- OLDICAT\_light\_C
- OLDICAT\_heavy\_C
- ICPL-N\_light\_NTERM
- ICAT\_light\_C
- AQUA\_heavy\_K\_K**
- AQUA\_heavy\_R\_R**
- Cys\_CAM\_C
- MetOx\_M

Decoy Generation

Algorithm: [Simple No Overlap Algorithm](#)

- [About SRM](#)
- [Help](#)

ATAQS PeptideAtlas

---

[PeptideAtlas Home](#)



---

**PeptideAtlas Home**

---

**Get PABST List**

---

Protein Accession:

Upload File Of Proteins:

Peptide Sequence:

Peptide Length:

Empirical Proteolytic Score:

Number of Proteins Mapped:

Number of Genome Locations Mapped:

Num of highest bits Frag tags to Keep:

Number of peptides per protein constraint:

Adjust penalties:

| Parameter | Value | Description                                               |
|-----------|-------|-----------------------------------------------------------|
| 4H:       | 1     | Avoid 4 consecutive hydrophobic residues: C,F,I,L,V,W,Y   |
| 5H:       | 1     | Avoid 5 straight hydrophobic residues: F,I,L,V,W,M        |
| BA:       | 1     | Penalize high basic (protonatable) sites: H, K, R, n-term |
| C:        | 0.95  | Avoid C                                                   |
| D:        | 1     | Slightly penalize D or S in general?                      |
| DG:       | 1     | Avoid dipeptide DG                                        |
| DP:       | 1     | Avoid dipeptide DP                                        |
| Hper:     | 1     | Hydrophobic residues (F,I,L,V,W,M) not to exceed 75%      |
| M:        | 0.95  | Avoid M                                                   |
| NG:       | 1     | Avoid dipeptide NG                                        |
| NxST:     | 1     | Penalize peptides without NxST motif                      |
| P:        | 0.95  | Avoid P                                                   |
| QG:       | 1     | Avoid dipeptide QG                                        |
| R:        | 1     | Avoid R                                                   |
| S:        | 1     | Slightly penalize D or S in general?                      |
