# Supplementary material for: ATAQS: A computational software tool for high throughput transition optimization and validation for selected reaction monitoring mass spectrometry
Source: Springer Nature journal article supplement (doi:10.1186/1471-2105-12-78), 2011-03-18

(a)

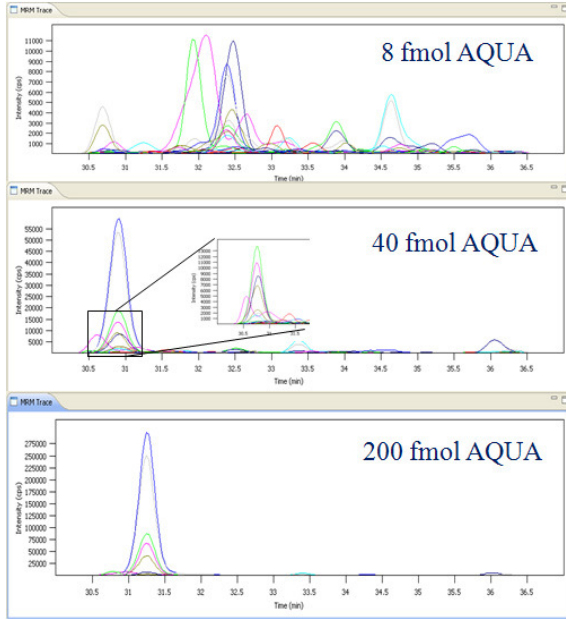

(b)

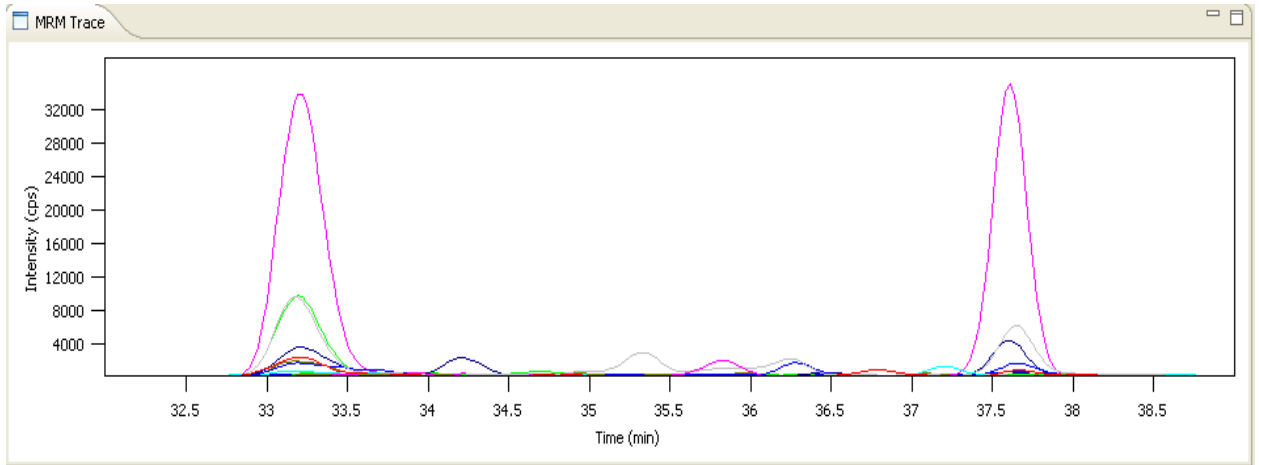

(c)

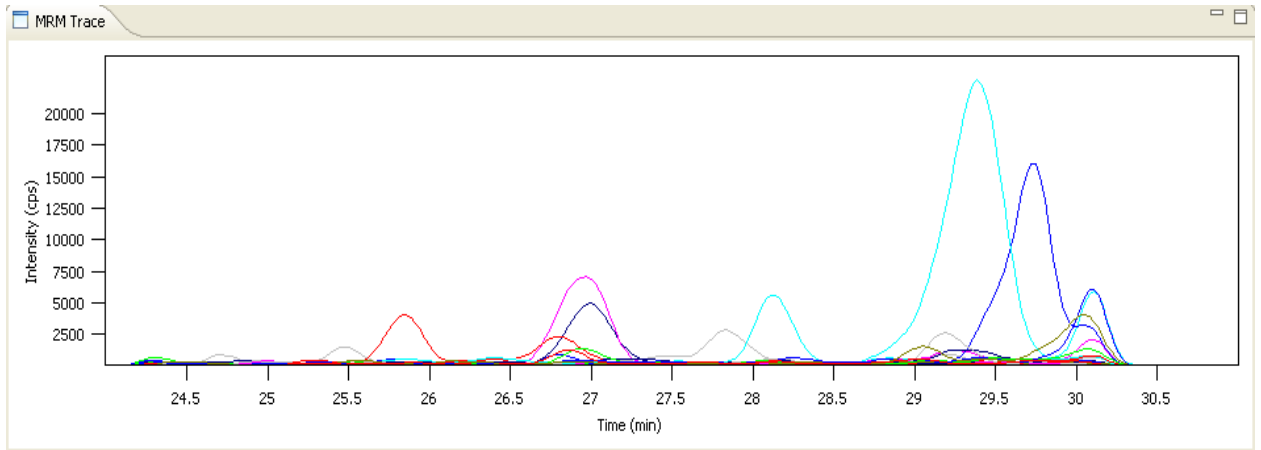

Supplement: 12859_2010_4455_MOESM11_ESM.pdf [file 12859_2010_4455_MOESM11_ESM.pdf]
